# Supplementary material for: Solar driven CO2 hydrogenation to HCOOH on (TiO2)n (n = 1–6) atomic clusters
Source: Royal Society of Chemistry journal article supplement (doi:10.1039/d3cp03473a), 2023-01-01
Supplement: d3cp03473a1.pdf [file d3cp03473a1.pdf]

## Supporting information for

### Solar driven CO<sub>2</sub> hydrogenation to HCOOH on (TiO<sub>2</sub>)<sub>n</sub> (n = 1–6) clusters

Jiaqi Tian,<sup>a</sup> Lei Hou,<sup>a</sup> Weizhi Xia,<sup>a</sup> Zi Wang,<sup>a</sup> Yusong Tu,<sup>a</sup>

Wei Pei,<sup>\*a</sup> Si Zhou,<sup>b</sup> Jijun Zhao<sup>c</sup>

<sup>a</sup>*College of Physics Science and Technology, Yangzhou University, Yangzhou 225009, China.*

<sup>b</sup>*School of Physics, South China Normal University, Guangzhou 510631, China*

<sup>c</sup>*Key Laboratory of Structural Analysis for Industrial Equipment, Dalian University of Technology, Dalian 116024, China*

\*Corresponding author. E-mail: pwei@yzu.edu.cn

**Table S1.** Key geometrical parameters of  $(\text{TiO}_2)_n$  ( $n = 1 - 6$ ) clusters including point group symmetry (sym.), average bond length ( $d_{\text{Ti-O}}$ ), and the bond angle between Ti atoms and terminated O atoms ( $\alpha_{\langle\text{Ti-O-Ti}\rangle}$ ) calculated by VASP and Gaussian 09 program.

| system             | sym.        |          | $d_{\text{Ti-O}}$ (Å) |      | $\alpha_{\langle\text{Ti-O-Ti}\rangle}$ (°) |        |
|--------------------|-------------|----------|-----------------------|------|---------------------------------------------|--------|
|                    | Gaussian 09 | VASP     | Gaussian 09           | VASP | Gaussian 09                                 | VASP   |
| $(\text{TiO}_2)_1$ | $C_{2v}$    | $C_{2v}$ | 1.66                  | 1.65 | 110.30                                      | 110.30 |
| $(\text{TiO}_2)_2$ | $C_{2h}$    | $C_{2h}$ | 1.65                  | 1.65 | 112.62                                      | 112.63 |
| $(\text{TiO}_2)_3$ | $C_s$       | $C_s$    | 1.64                  | 1.66 | 120.61                                      | 119.41 |
| $(\text{TiO}_2)_4$ | $C_{2v}$    | $C_{2v}$ | 1.64                  | 1.65 | 119.21                                      | 119.21 |
| $(\text{TiO}_2)_5$ | $C_s$       | $C_s$    | 1.64                  | 1.66 | 121.86                                      | 120.98 |
| $(\text{TiO}_2)_6$ | $C_2$       | $C_2$    | 1.64                  | 1.65 | 114.27                                      | 114.56 |

**Table S2.** The energy gap between HOMO and LUMO of  $(\text{TiO}_2)_n$  ( $n = 1 - 6$ ) clusters calculated by VASP and Gaussian 09 program based on PBE and HSE06 functional.

|                    | VASP |       | Gaussian 09 |       |
|--------------------|------|-------|-------------|-------|
|                    | PBE  | HSE06 | PBE         | HSE06 |
| $(\text{TiO}_2)_1$ | 2.07 | 3.64  | 2.26        | 3.78  |
| $(\text{TiO}_2)_2$ | 2.89 | 4.79  | 3.12        | 4.84  |
| $(\text{TiO}_2)_3$ | 1.58 | 3.32  | 1.83        | 3.56  |
| $(\text{TiO}_2)_4$ | 2.95 | 4.87  | 2.78        | 4.92  |
| $(\text{TiO}_2)_5$ | 2.67 | 4.52  | 2.72        | 4.63  |
| $(\text{TiO}_2)_6$ | 2.48 | 4.36  | 2.50        | 4.48  |

**Table S3.** Gibbs free energy of CO<sub>2</sub> molecule on (TiO<sub>2</sub>)<sub>n</sub> (*n* = 1 – 6) clusters calculated by VASP and Gaussian 09 program.

| Method   |          | (TiO <sub>2</sub> ) <sub>1</sub> | (TiO <sub>2</sub> ) <sub>2</sub> | (TiO <sub>2</sub> ) <sub>3</sub> | (TiO <sub>2</sub> ) <sub>4</sub> | (TiO <sub>2</sub> ) <sub>5</sub> | (TiO <sub>2</sub> ) <sub>6</sub> |
|----------|----------|----------------------------------|----------------------------------|----------------------------------|----------------------------------|----------------------------------|----------------------------------|
| VASP     | PBE      | -0.54                            | -0.23                            | 0.18                             | 0.21                             | 0.47                             | 0.86                             |
|          | PBE-D2   | -0.60                            | -0.34                            | -0.08                            | -0.02                            | 0.25                             | 0.65                             |
|          | PBE-D3   | -0.68                            | -0.36                            | -0.10                            | 0.03                             | 0.33                             | 0.65                             |
|          | HSE06    | -0.52                            | -0.22                            | 0.18                             | 0.23                             | 0.45                             | 0.82                             |
|          | HSE06-D2 | -0.58                            | -0.32                            | -0.10                            | -0.05                            | 0.23                             | 0.58                             |
|          | HSE06-D3 | -0.68                            | -0.34                            | -0.11                            | 0.05                             | 0.36                             | 0.62                             |
| Gaussian | PBE      | -0.48                            | -0.25                            | 0.20                             | 0.24                             | 0.52                             | 0.93                             |
|          | PBE-D3   | -0.62                            | -0.34                            | -0.06                            | 0.03                             | 0.23                             | 0.54                             |
|          | HSE06    | -0.50                            | -0.22                            | 0.21                             | 0.26                             | 0.54                             | 0.93                             |

(Unit: eV)

**Table S4.** Zero-point energy (ZPE) and entropic correction ( $TS$ ) at  $T=298.15$  K for the molecules of  $H_2$ ,  $H_2O$ ,  $CO$ ,  $CO_2$ ,  $HCOOH$ ,  $CH_2O$ ,  $CH_3OH$ , and  $CH_4$ .

| Species  | ZPE (eV) | $TS$ (eV) | ZPE- $TS$ (eV) |
|----------|----------|-----------|----------------|
| $H_2$    | 0.29     | 0.41      | -0.12          |
| $H_2O$   | 0.60     | 0.59      | 0.01           |
| $CO$     | 0.14     | 0.62      | -0.48          |
| $CO_2$   | 0.31     | 0.67      | -0.45          |
| $HCOOH$  | 0.92     | 1.02      | -0.10          |
| $CH_2O$  | 0.72     | 0.68      | 0.04           |
| $CH_3OH$ | 1.39     | 0.79      | 0.60           |
| $CH_4$   | 1.20     | 0.58      | 0.61           |

**Table S5.** Computational ZPE and  $TS$  at  $T=298.15$  K for intermediate species involved in the  $\text{CO}_2$  hydrogenation reaction on  $(\text{TiO}_2)_4$  cluster, as a representative of  $(\text{TiO}_2)_n$  ( $n = 1-6$ ) clusters.

| Species                  | ZPE (eV) | $TS$ (eV) | ZPE- $TS$ (eV) |
|--------------------------|----------|-----------|----------------|
| * $\text{CO}_2$          | 0.31     | 0.14      | 0.15           |
| * $\text{OOCH}$          | 0.58     | 0.22      | 0.36           |
| * $\text{COOH}$          | 0.63     | 0.12      | 0.51           |
| * $\text{CO}$            | 0.25     | 0.10      | 0.15           |
| * $\text{HCOOH}$         | 0.89     | 0.25      | 0.64           |
| * $\text{CHO}$           | 0.51     | 0.17      | 0.34           |
| * $\text{CH}_2\text{O}$  | 0.79     | 0.15      | 0.64           |
| * $\text{CH}_2\text{OH}$ | 1.13     | 0.28      | 0.85           |
| * $\text{CH}_2$          | 0.72     | 0.16      | 0.58           |
| * $\text{CH}_3$          | 0.98     | 0.14      | 0.84           |

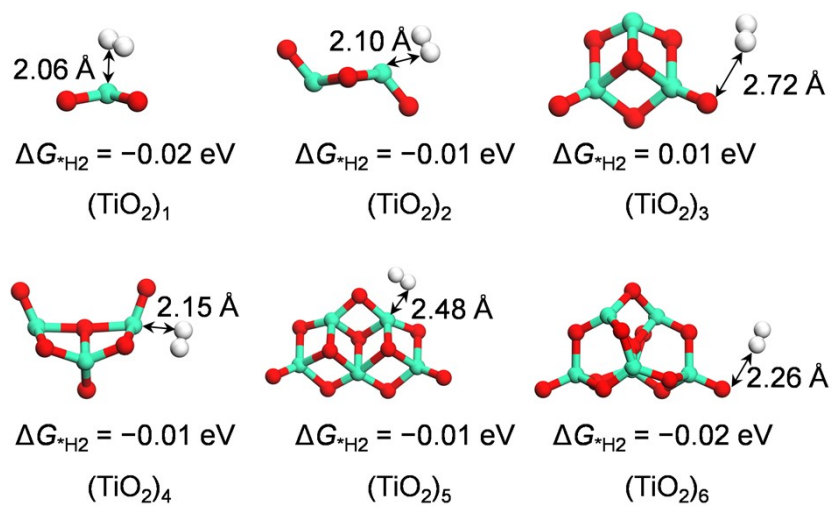

**Fig. S1.** The atomic configuration of a  $H_2$  molecule on  $(TiO_2)_n$  clusters. The minimum distance between  $H_2$  and  $(TiO_2)_n$  and corresponding Gibbs free energy of  $H_2$  adsorption was shown.

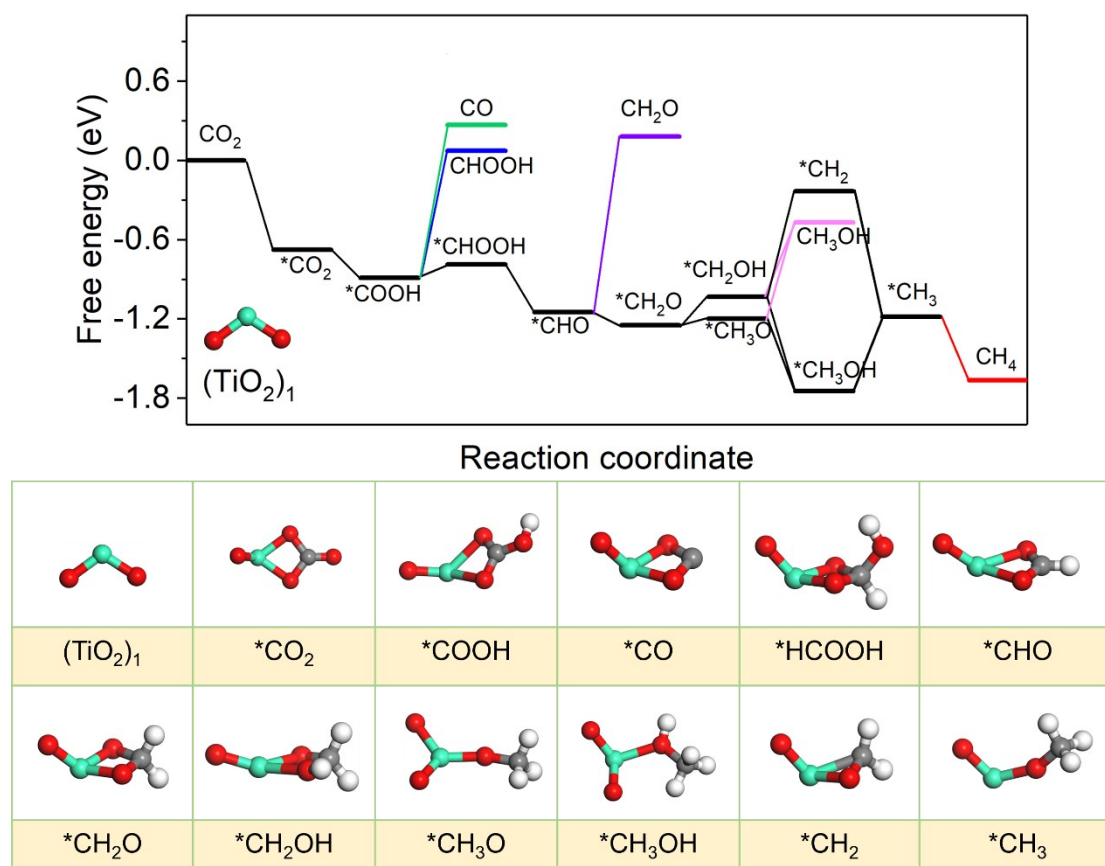

**Fig. S2.** The free energy profiles of CO<sub>2</sub> hydrogenation reaction on (TiO<sub>2</sub>)<sub>1</sub> cluster and corresponding atomic structures of reaction intermediates. The Ti, O, C, and H atoms are shown in cyan, red, gray, and white colors, respectively.



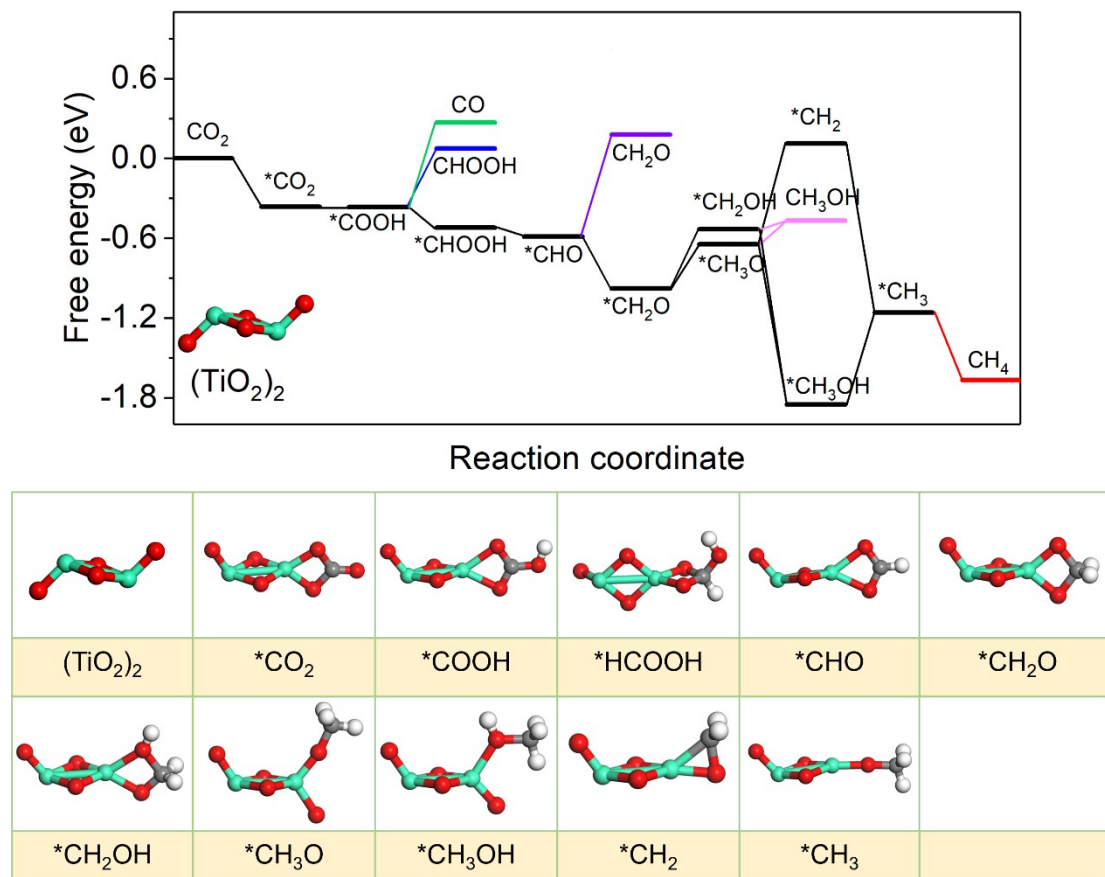

**Fig. S3.** The free energy profiles of CO<sub>2</sub> hydrogenation reaction on (TiO<sub>2</sub>)<sub>2</sub> cluster and corresponding atomic structures of reaction intermediates. The Ti, O, C, and H atoms are shown in cyan, red, gray, and white colors, respectively.

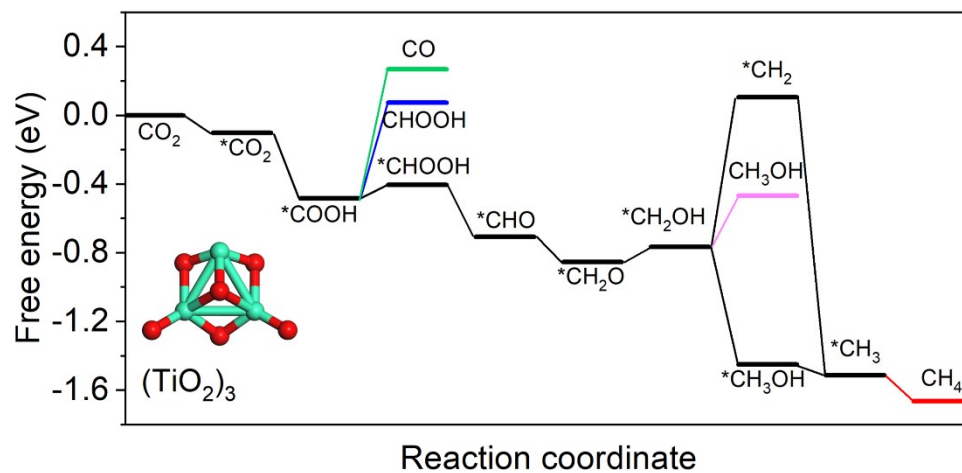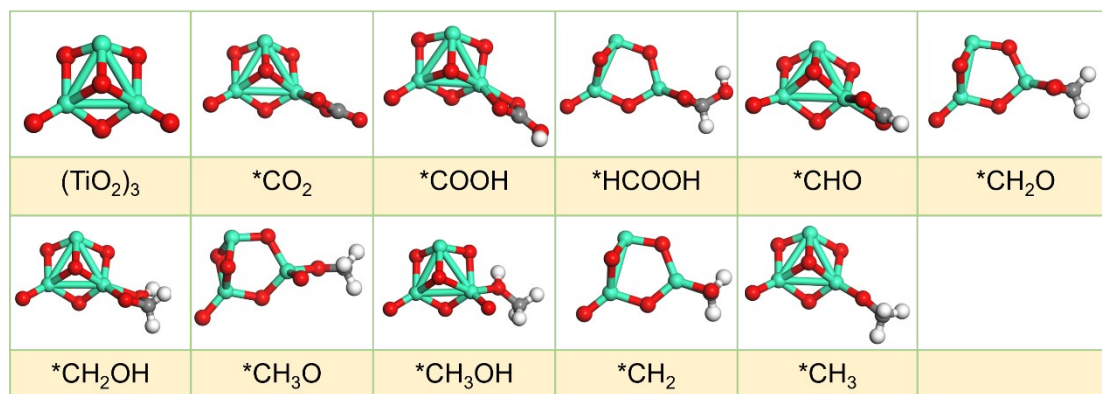

**Fig. S4.** The free energy profiles of CO<sub>2</sub> hydrogenation reaction on (TiO<sub>2</sub>)<sub>3</sub> cluster and corresponding atomic structures of reaction intermediates. The Ti, O, C, and H atoms are shown in cyan, red, gray, and white colors, respectively.

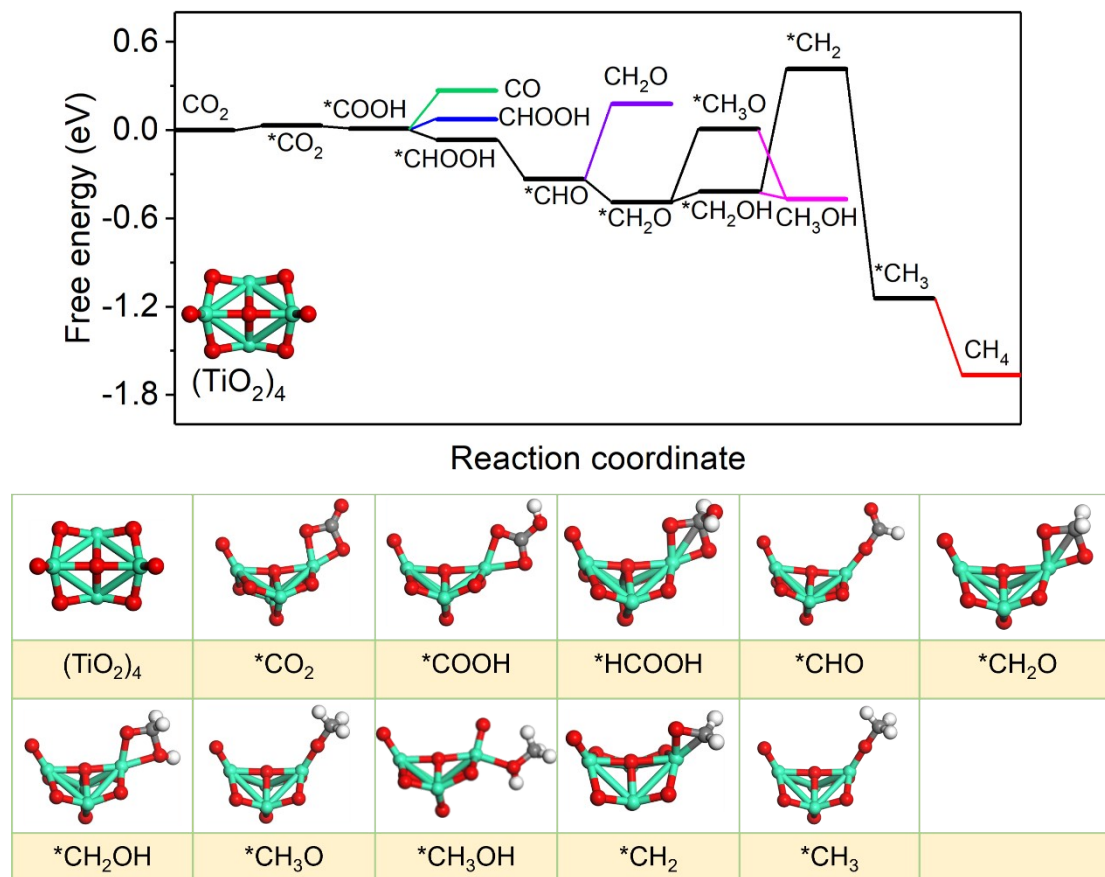

**Fig. S5.** The free energy profiles of CO<sub>2</sub> hydrogenation reaction on (TiO<sub>2</sub>)<sub>4</sub> cluster and corresponding atomic structures of reaction intermediates. The Ti, O, C, and H atoms are shown in cyan, red, gray, and white colors, respectively.

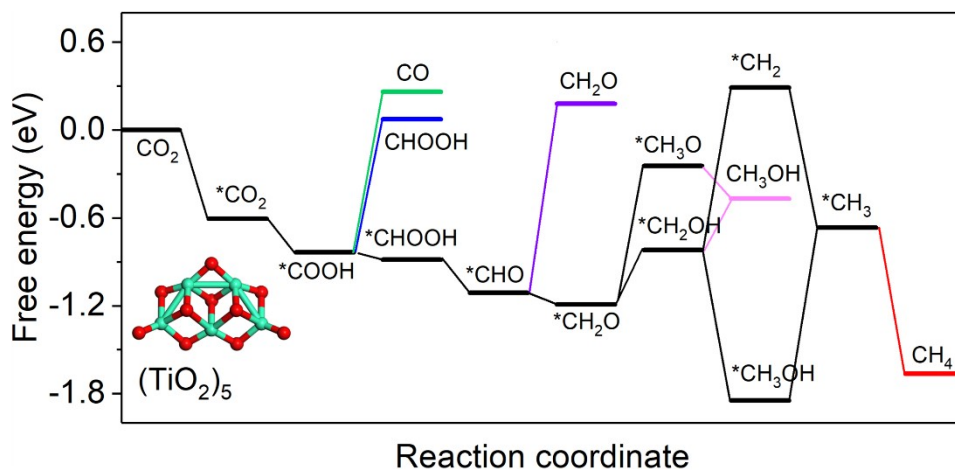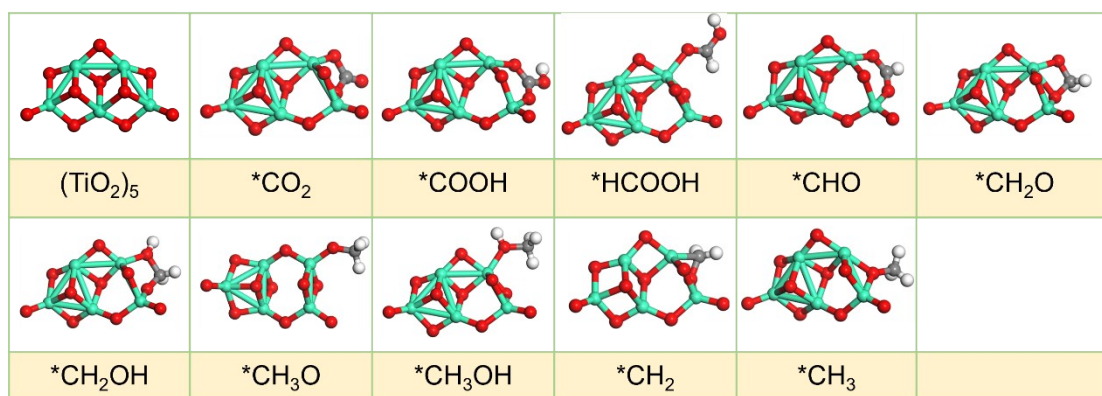

**Fig. S6.** The free energy profiles of CO<sub>2</sub> hydrogenation reaction on (TiO<sub>2</sub>)<sub>5</sub> cluster and corresponding atomic structures of reaction intermediates. The Ti, O, C, and H atoms are shown in cyan, red, gray, and white colors, respectively.

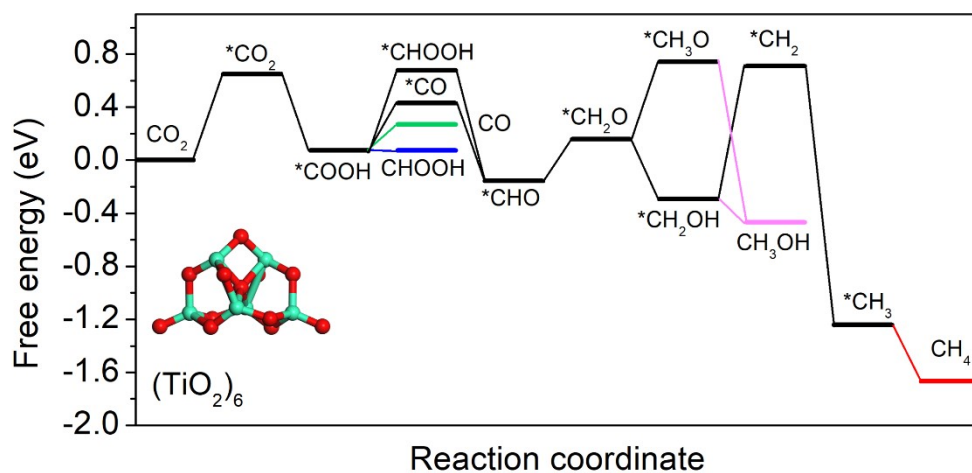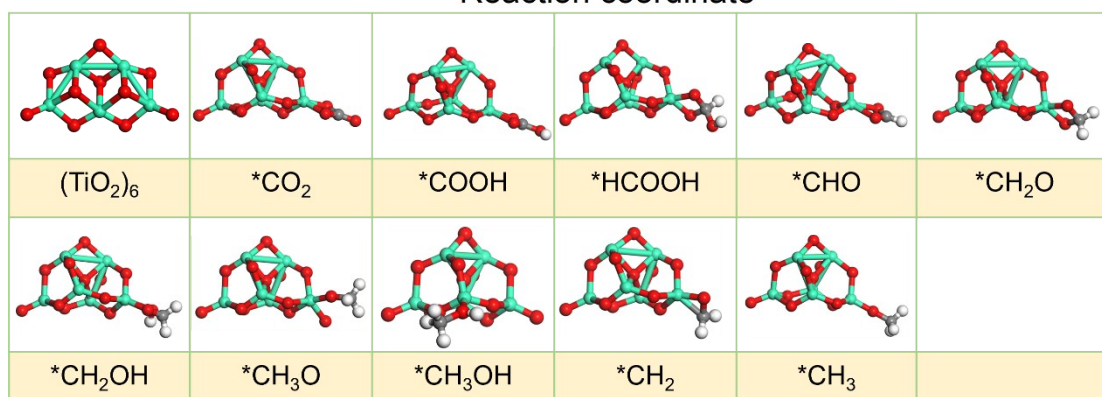

**Fig. S7.** The free energy profiles of CO<sub>2</sub> hydrogenation reaction on (TiO<sub>2</sub>)<sub>6</sub> cluster and corresponding atomic structures of reaction intermediates. The Ti, O, C, and H atoms are shown in cyan, red, gray, and white colors, respectively.
